# Supplementary material
Source: HighWire-hosted journal article supplement (https://jech.bmj.com/content/73/2/100)
Supplement: inline-supplementary-material-1 [file inline-supplementary-material-1.pdf]

Supplementary materials to  
Intergenerational Social Mobility and  
Allostatic Load in Great Britain

Patrick Präg      Lindsay Richards

Nuffield College and Department of Sociology,  
University of Oxford

This supplement includes additional information and robustness checks to the analyses of the manuscript ‘Intergenerational Social Mobility and Allostatic Load in Great Britain.’

Below is a list of Tables included in the supplement:

|    |                                                                                      |    |
|----|--------------------------------------------------------------------------------------|----|
| A1 | Data selection . . . . .                                                             | 3  |
| A2 | Clinical cutoff values for calculating allostatic load sum of risk factors . . . . . | 4  |
| A3 | Descriptive statistics . . . . .                                                     | 4  |
| A4 | DRM of allostatic load, interactions—full models . . . . .                           | 5  |
| A5 | DRM of allostatic load (elevated risk zone version) . . . . .                        | 9  |
| A6 | DRM of components of allostatic load . . . . .                                       | 10 |
| A7 | DRM of allostatic load, social class determined by dominance principle . . . . .     | 11 |
| A8 | DRM of allostatic load, five classes . . . . .                                       | 12 |

|     |                                                                                                         |    |
|-----|---------------------------------------------------------------------------------------------------------|----|
| A9  | DRM of allostatic load, controlling for education . . . . .                                             | 13 |
| A10 | DRM of allostatic load, stratified by sex . . . . .                                                     | 14 |
| A11 | DRM of allostatic load, controlling for health behaviors in<br>Wave 2 . . . . .                         | 15 |
| A12 | DRM predicting allostatic load, excluding unemployed respon-<br>dents . . . . .                         | 16 |
| A13 | DRM of allostatic load, stratified by age groups: below and<br>above average age (52.2 years) . . . . . | 17 |
| A14 | DRM of allostatic load, stratified by age groups: age groups<br>25–39 years and 60–79 years . . . . .   | 18 |

## Background information

**Data selection** Table A1 shows the selection process of cases from the UKHLS data (University of Essex *et al.*, 2016; University of Essex and Institute for Social and Economic Research, 2014) that went into the analyses. More information on the participant selection process for the nurse interviews and the biomarker measurements can be found in Benzeval *et al.* (2014) and McFall *et al.* (2014).

**Cut-off values for elevated risk-zone of biomarkers** Table A2 reports the clinical cutoff values chosen to calculate allostatic load as the sum of risk factors als well as references to the literature on which these cutoff values are based on. We use these cut-off values to conduct the robustness check shown in Table A5.

**Descriptive statistics of control variables** Table A3 presents descriptive statistics for the control variables in the models.

**Full tables of interaction models** Table A4 presents the full tables to the interaction models presented in Table 3 of the main text. While the

Table 3 only shows the interaction terms for a more parsimonious presentation, Table A4 reports all parameters estimated in the models for the sake of completeness.

Table A1: Data selection

|                                                                                                     | <i>N</i> |
|-----------------------------------------------------------------------------------------------------|----------|
| Adult respondents                                                                                   | 48,328   |
| Not eligible (Northern Ireland, incomplete interview, different language, not selected in PSU year) | -12,452  |
| Eligible for the nurse visit                                                                        | 35,937   |
| Pregnant, ill, died, out of scope                                                                   | -349     |
| No contact                                                                                          | -5,534   |
| Refusal nurse visit                                                                                 | -9,354   |
| Not eligible for blood sample                                                                       | -1,579   |
| No consent to give or store blood sample or reported inability to give blood                        | -4,688   |
| Unable to give blood sample                                                                         | -1,105   |
| Unable to process samples                                                                           | -221     |
| Less than five biomarkers                                                                           | -957     |
| Origin or destination class missing                                                                 | -2,292   |
| Control variables missing                                                                           | -7       |
| Cases for analysis                                                                                  | 9,851    |

Table A2: Clinical cutoff values for calculating allostatic load sum of risk factors

| Measure                        | Cutoff value          | Reference                      |
|--------------------------------|-----------------------|--------------------------------|
| Systolic blood pressure (SBP)  | 140                   | Chobanian <i>et al.</i> (2003) |
| Diastolic blood pressure (DBP) | 90                    | Chobanian <i>et al.</i> (2003) |
| Resting heart rate (HR)        | 90                    | Chobanian <i>et al.</i> (2003) |
| Total cholesterol (TC)         | 6.2                   | NCEP Expert Panel (2001)       |
| HDL cholesterol                | 1                     | NCEP Expert Panel (2001)       |
| Triglycerides (TG)             | 2                     | Kolovou <i>et al.</i> (2011)   |
| HbA1c                          | 48                    | WHO (2011)                     |
| C-reactive protein (CRP)       | 3                     | Pearson <i>et al.</i> (2003)   |
| Fibrinogen                     | Men: 3.2, women: 3.1  | –                              |
| BMI                            | 25                    | WHO (2017)                     |
| Waist circumference            | Men: 98.2, women: 107 | –                              |

*Note:* Due to a lack of an established clinical standard for high fibrinogen and waist circumference, we used the sex-specific 75th percentile as cutoff values.

Table A3: Descriptive statistics

|                                      | Percentage |
|--------------------------------------|------------|
| Sex (1 = female)                     | 55.6       |
| Ethnicity (1 = white)                | 95.9       |
| Married (1 = yes)                    | 62.6       |
| Single/never married (1 = yes)       | 16.0       |
| Divorced/widowed (1 = yes)           | 21.4       |
| Employed/self-employed (1 = yes)     | 63.3       |
| Retired (1 = yes)                    | 25.2       |
| Other labour market status (1 = yes) | 11.5       |
| Observations                         | 9851       |

Table A4: DRM of allostatic load, interactions—full models

|                                      | (1)<br>Female             | (2)<br>Age                | (3)<br>Mobile             | (4)<br>Downwardly mobile  | (5)<br>Upwardly mobile    | (6)<br>Retired            | (7)<br>Other job status   |
|--------------------------------------|---------------------------|---------------------------|---------------------------|---------------------------|---------------------------|---------------------------|---------------------------|
| Working class                        | 0.22***<br>[0.19,0.26]    | 0.22***<br>[0.19,0.26]    | 0.22***<br>[0.19,0.26]    | 0.22***<br>[0.19,0.26]    | 0.22***<br>[0.19,0.26]    | 0.22***<br>[0.19,0.26]    | 0.23***<br>[0.19,0.26]    |
| Intermediate class                   | -0.02<br>[-0.06,0.02]     | -0.02<br>[-0.06,0.02]     | -0.02<br>[-0.06,0.02]     | -0.02<br>[-0.06,0.02]     | -0.02<br>[-0.06,0.02]     | -0.02<br>[-0.06,0.02]     | -0.03<br>[-0.07,0.01]     |
| Salariat                             | -0.20***<br>[-0.24,-0.17] | -0.20***<br>[-0.24,-0.17] | -0.20***<br>[-0.24,-0.17] | -0.20***<br>[-0.24,-0.17] | -0.20***<br>[-0.24,-0.17] | -0.20***<br>[-0.24,-0.17] | -0.20***<br>[-0.23,-0.16] |
| Interaction term                     | 0.09<br>[-0.08,0.26]      | -0.00<br>[-0.01,0.00]     | -0.00<br>[-0.09,0.08]     | 0.04<br>[-0.19,0.28]      | -0.04<br>[-0.28,0.19]     | -0.05<br>[-0.24,0.14]     | -0.34*<br>[-0.67,-0.02]   |
| Origin weight                        | 0.44<br>[0.32,0.57]       | 0.49<br>[0.41,0.58]       | 0.50<br>[0.50,0.50]       | 0.48<br>[0.35,0.60]       | 0.52<br>[0.35,0.68]       | 0.51<br>[0.41,0.60]       | 0.53<br>[0.44,0.61]       |
| Sex (1 = female)                     | -0.22***<br>[-0.26,-0.18] | -0.21***<br>[-0.25,-0.18] | -0.21***<br>[-0.25,-0.18] | -0.21***<br>[-0.25,-0.18] | -0.21***<br>[-0.25,-0.18] | -0.21***<br>[-0.25,-0.18] | -0.21***<br>[-0.25,-0.17] |
| Age (centered)                       | 0.02***<br>[0.02,0.02]    |
| Ethnicity (1 = white)                | -0.15**<br>[-0.25,-0.05]  |
| Marital status (ref. married)        |                           |                           |                           |                           |                           |                           |                           |
| Single/never married (1 = yes)       | -0.08**<br>[-0.14,-0.03]  |
| Divorced/widowed (1 = yes)           | 0.08**<br>[0.03,0.13]     |
| Labor market status (ref. working)   |                           |                           |                           |                           |                           |                           |                           |
| Retired (1 = yes)                    | -0.11***<br>[-0.17,-0.05] | -0.11***<br>[-0.17,-0.05] | -0.11***<br>[-0.17,-0.05] | -0.11***<br>[-0.17,-0.05] | -0.11***<br>[-0.17,-0.05] | -0.11***<br>[-0.17,-0.04] | -0.11***<br>[-0.17,-0.05] |
| Other labour market status (1 = yes) | 0.21***<br>[0.14,0.28]    | 0.21***<br>[0.14,0.28]    | 0.21***<br>[0.14,0.28]    | 0.21***<br>[0.14,0.28]    | 0.21***<br>[0.14,0.28]    | 0.21***<br>[0.14,0.28]    | 0.21***<br>[0.13,0.28]    |
| Constant                             | 0.24***<br>[0.14,0.35]    | 0.24***<br>[0.14,0.34]    | 0.24***<br>[0.14,0.34]    | 0.24***<br>[0.14,0.35]    | 0.24***<br>[0.14,0.35]    | 0.24***<br>[0.14,0.34]    | 0.24***<br>[0.14,0.34]    |
| Observations                         | 9,851                     | 9,851                     | 9,851                     | 9,851                     | 9,851                     | 9,851                     | 9,851                     |
| AIC                                  | 26863.7                   | 26862.6                   | 26862.8                   | 26864.7                   | 26864.7                   | 26864.6                   | 26858.4                   |
| BIC                                  | 26957.3                   | 26956.2                   | 26949.2                   | 26958.3                   | 26958.3                   | 26958.2                   | 26952.0                   |

Notes: 95% confidence intervals in brackets.

\* p &lt; .05, \*\* p &lt; .01, \*\*\* p &lt; .001.

Destination parameters (which equal  $-1 \times$  origin parameters) and destination weight (which equals  $1 -$  origin weight) not displayed.

## Robustness checks

**Elevated risk-zone version of allostatic load** Table A5 reports the analyses of Table 2 from the main text using a different way of calculating the allostatic load outcome. We do this to assess the robustness of our findings with respect to the way we conceptualized allostatic load. For Table A5, we make use of the ‘elevated risk zone’ approach (Singer *et al.*, 2004). For this, we use cut-off values listed in Table A2, count cases beyond the cut-off values as 1, adding up all high-risk biomarkers, and standardizing the sum of high-risk biomarkers. This approach has the additional benefit that we can account for prescribed medications which may be suppressing allostatic load. Respondents taking blood pressure medications are considered to be at high risk in terms of systolic blood pressure, statins are deemed to indicate high risk on total cholesterol, anti-inflammatories indicate high risk on CRP, and antifibrinolytic or haemostatics deemed indicative of high risk on fibrinogen (following Benzeval *et al.*, 2014; Seeman *et al.*, 2014).

**Separate dimensions of allostatic load** Table A6 reports the analyses of Table 2 from the main text, using the single dimensions of allostatic load as outcomes.

**Dominance approach to social class** Table A7 presents the analyses of Table 2 from the main text using a different way of calculating the social class variables. We do this to assess the robustness of our findings with respect to the way we operationalized social class. In Table A7, we calculated class using the dominance approach (Erikson, 1984) in which class of origin was determined as the highest class reported for father or mother and class of destination as the highest of the respondent and the respondent’s co-resident partner.

**Expanded social class scheme** Table A8 presents the analyses of Table 2 from the main text, including a greater number of occupational classes.

Rather than just distinguishing between working class (35%), intermediate class (24%), and salariat (40%) like we did in Table 2, we make use of a five-class scheme based on NS-SEC. The five-class scheme further differentiates between routine (e.g. cleaner or truck driver) and semi-routine jobs (e.g. sales and retail assistant) in the working class as well as between a higher (e.g. CEO or stock broker) and a lower salariat (e.g. teacher or IT consultant).

**Education** Table A9 presents the analyses of Table 2 from the main text, controlling for educational attainment. Education is an important pathway variable of the social mobility trajectories of individuals (Blau and Duncan, 1967; Breen and Jonsson, 2005; Torche, 2015). Educational attainment is coded as University (comprising respondents with a Degree or an Other higher degree, 37% of the sample), and No qualifications (13%); Secondary education (i.e. A-level etc., GCSE etc., and Other qualifications, 49%) serving as the reference category.

**Gender differences** Table A10 reports the analyses of Table 2 from the main text stratified by sex to examine the robustness of our findings with regards to gender differences.

**Health behaviors** Table A11 shows the analyses of Table 2 from the main text controlling for health behaviors measured in Wave 2 of UKHLS. If the respondent had eaten (9%), smoked (6%), consumed alcohol (1%), or exercised (1%) in the 30 minutes before the nurse visit, cardiovascular measures were invalidated. Thus, this is an essential robustness check. Health behaviors were only collected in Wave 2 but for this subset we account for sport activity, smoking status, and fruit and vegetable consumption.

**Unemployment** Table A12 shows the analyses of Table 2 from the main text excluding 244 respondents who were unemployed at the time of the interview.

**Age** Table A13 presents the analyses of Table 2 from the main text, stratifying the sample by respondents younger and older than the average age of 52.3 years. (Median age in the sample is 52 years.)

Table A5: DRM of allostatic load (elevated risk zone version)

|                                      | (1)                       | (2)                       | (3)                       | (4)                       | (5)                       | (6)                       |
|--------------------------------------|---------------------------|---------------------------|---------------------------|---------------------------|---------------------------|---------------------------|
| Working class                        | 0.23***<br>[0.20,0.27]    | 0.23***<br>[0.19,0.26]    | 0.23***<br>[0.20,0.26]    | 0.23***<br>[0.20,0.27]    | 0.23***<br>[0.20,0.27]    | 0.24***<br>[0.20,0.27]    |
| Intermediate class                   | -0.03<br>[-0.07,0.01]     | -0.03<br>[-0.07,0.02]     | -0.03<br>[-0.07,0.01]     | -0.03<br>[-0.07,0.02]     | -0.03<br>[-0.07,0.01]     | -0.04<br>[-0.09,0.01]     |
| Salariat                             | -0.20***<br>[-0.24,-0.17] | -0.20***<br>[-0.24,-0.17] | -0.20***<br>[-0.24,-0.17] | -0.20***<br>[-0.24,-0.17] | -0.20***<br>[-0.24,-0.17] | -0.20***<br>[-0.23,-0.16] |
| Origin weight                        | 0.50<br>[0.42,0.58]       | 0.50<br>[0.42,0.59]       | 0.46<br>[0.35,0.58]       | 0.48<br>[0.32,0.64]       | 0.45<br>[0.33,0.58]       | 0.52<br>[0.35,0.69]       |
| Sex (1 = female)                     | -0.24***<br>[-0.28,-0.21] | -0.24***<br>[-0.28,-0.21] | -0.24***<br>[-0.28,-0.21] | -0.24***<br>[-0.28,-0.21] | -0.24***<br>[-0.28,-0.21] | -0.25***<br>[-0.28,-0.21] |
| Age (centered)                       | 0.02***<br>[0.01,0.02]    | 0.02***<br>[0.01,0.02]    | 0.02***<br>[0.01,0.02]    | 0.02***<br>[0.01,0.02]    | 0.02***<br>[0.01,0.02]    | 0.02***<br>[0.01,0.02]    |
| Ethnicity (1 = white)                | -0.03<br>[-0.13,0.07]     | -0.03<br>[-0.13,0.07]     | -0.03<br>[-0.13,0.07]     | -0.03<br>[-0.13,0.07]     | -0.03<br>[-0.13,0.07]     | -0.03<br>[-0.13,0.07]     |
| Marital status (ref. married)        |                           |                           |                           |                           |                           |                           |
| Single/never married (1 = yes)       | -0.06*<br>[-0.12,-0.01]   | -0.06*<br>[-0.12,-0.01]   | -0.06*<br>[-0.12,-0.01]   | -0.06*<br>[-0.12,-0.01]   | -0.06*<br>[-0.12,-0.01]   | -0.06*<br>[-0.12,-0.01]   |
| Divorced/widowed (1 = yes)           | 0.06*<br>[0.01,0.11]      | 0.06*<br>[0.01,0.11]      | 0.06*<br>[0.01,0.11]      | 0.06*<br>[0.01,0.11]      | 0.06*<br>[0.01,0.11]      | 0.06*<br>[0.01,0.11]      |
| Labor market status (ref. working)   |                           |                           |                           |                           |                           |                           |
| Retired (1 = yes)                    | -0.00<br>[-0.06,0.06]     | -0.00<br>[-0.06,0.06]     | -0.00<br>[-0.07,0.06]     | 0.00<br>[-0.06,0.06]      | -0.00<br>[-0.07,0.06]     | 0.00<br>[-0.06,0.06]      |
| Other labour market status (1 = yes) | 0.25***<br>[0.19,0.32]    | 0.25***<br>[0.19,0.32]    | 0.25***<br>[0.19,0.32]    | 0.25***<br>[0.19,0.32]    | 0.25***<br>[0.19,0.32]    | 0.25***<br>[0.19,0.32]    |
| Mobility in any direction (1 = yes)  |                           | -0.01<br>[-0.05,0.03]     |                           |                           |                           |                           |
| Downward mobility (1 = yes)          |                           |                           | -0.03<br>[-0.09,0.04]     |                           |                           |                           |
| Upward mobility (1 = yes)            |                           |                           |                           | 0.01<br>[-0.07,0.08]      |                           |                           |
| One-step downward mobility (1 = yes) |                           |                           |                           |                           | -0.02<br>[-0.09,0.05]     |                           |
| Two-step downward mobility (1 = yes) |                           |                           |                           |                           | -0.05<br>[-0.16,0.06]     |                           |
| One-step upward mobility (1 = yes)   |                           |                           |                           |                           |                           | 0.02<br>[-0.06,0.09]      |
| Two-step upward mobility (1 = yes)   |                           |                           |                           |                           |                           | -0.04<br>[-0.13,0.06]     |
| Constant                             | 0.11*<br>[0.01,0.22]      | 0.12*<br>[0.01,0.22]      | 0.12*<br>[0.02,0.23]      | 0.11*<br>[0.01,0.21]      | 0.12*<br>[0.02,0.23]      | 0.11*<br>[0.01,0.22]      |
| Observations                         | 9,851                     | 9,851                     | 9,851                     | 9,851                     | 9,851                     | 9,851                     |
| AIC                                  | 26782.9                   | 26794.8                   | 26784.3                   | 26784.8                   | 26786.0                   | 26785.0                   |
| BIC                                  | 26869.2                   | 26878.3                   | 26877.8                   | 26878.3                   | 26886.7                   | 26885.7                   |

Notes: 95% confidence intervals in brackets.

\* p < .05, \*\* p < .01, \*\*\* p < .001.

Destination parameters (which equal  $-1 \times$  origin parameters) and destination weight (which equals  $1 -$  origin weight) not displayed.

Table A6: DRM of components of allostatic load

|                                      | (1)                       | (2)                       | (3)                       | (4)                       | (5)                       |
|--------------------------------------|---------------------------|---------------------------|---------------------------|---------------------------|---------------------------|
|                                      | Cardiovascular            | Lipid metabolism          | Inflammation              | Body fat deposition       | Glucose metabolism        |
| Working class                        | 0.10***<br>[0.06,0.13]    | 0.10***<br>[0.06,0.13]    | 0.10***<br>[0.06,0.13]    | 0.20***<br>[0.17,0.24]    | 0.13***<br>[0.10,0.17]    |
| Intermediate class                   | -0.04<br>[-0.08,0.00]     | 0.03<br>[-0.01,0.07]      | 0.03<br>[-0.01,0.07]      | -0.02<br>[-0.06,0.02]     | -0.03<br>[-0.08,0.01]     |
| Salariat                             | -0.06**<br>[-0.09,-0.02]  | -0.13***<br>[-0.17,-0.09] | -0.13***<br>[-0.17,-0.09] | -0.18***<br>[-0.22,-0.15] | -0.10***<br>[-0.13,-0.06] |
| Origin weight                        | 0.26<br>[-0.00,0.52]      | 0.57<br>[0.42,0.73]       | 0.57<br>[0.42,0.73]       | 0.57<br>[0.47,0.67]       | 0.39<br>[0.23,0.55]       |
| Sex (1 = female)                     | -0.19***<br>[-0.24,-0.15] | -0.51***<br>[-0.55,-0.47] | -0.51***<br>[-0.55,-0.47] | -0.41***<br>[-0.45,-0.38] | -0.11***<br>[-0.14,-0.07] |
| Age (centered)                       | 0.01***<br>[0.01,0.01]    | 0.00*<br>[0.00,0.00]      | 0.00*<br>[0.00,0.00]      | 0.01***<br>[0.01,0.01]    | 0.02***<br>[0.02,0.02]    |
| Ethnicity (1 = white)                | -0.04<br>[-0.15,0.06]     | 0.08<br>[-0.01,0.17]      | 0.08<br>[-0.01,0.17]      | 0.09<br>[-0.00,0.18]      | -0.34***<br>[-0.45,-0.22] |
| Marital status (ref. married)        |                           |                           |                           |                           |                           |
| Single/never married (1 = yes)       | -0.03<br>[-0.09,0.03]     | -0.12***<br>[-0.18,-0.07] | -0.12***<br>[-0.18,-0.07] | -0.15***<br>[-0.21,-0.09] | -0.04<br>[-0.08,0.01]     |
| Divorced/widowed (1 = yes)           | 0.09**<br>[0.03,0.14]     | 0.04<br>[-0.01,0.09]      | 0.04<br>[-0.01,0.09]      | 0.01<br>[-0.04,0.06]      | 0.06*<br>[0.00,0.11]      |
| Labor market status (ref. working)   |                           |                           |                           |                           |                           |
| Retired (1 = yes)                    | -0.18***<br>[-0.25,-0.11] | -0.16***<br>[-0.23,-0.09] | -0.16***<br>[-0.23,-0.09] | -0.05<br>[-0.11,0.01]     | -0.02<br>[-0.09,0.04]     |
| Other labour market status (1 = yes) | 0.05<br>[-0.02,0.12]      | 0.05<br>[-0.02,0.12]      | 0.05<br>[-0.02,0.12]      | 0.15***<br>[0.08,0.23]    | 0.20***<br>[0.12,0.28]    |
| Constant                             | 0.19***<br>[0.08,0.31]    | 0.29***<br>[0.19,0.38]    | 0.29***<br>[0.19,0.38]    | 0.19***<br>[0.10,0.28]    | 0.35***<br>[0.23,0.47]    |
| Observations                         | 8,195                     | 9,726                     | 9,726                     | 9,796                     | 9,202                     |
| AIC                                  | 22993.2                   | 27209.3                   | 27209.3                   | 26578.5                   | 24696.1                   |
| BIC                                  | 23077.4                   | 27295.5                   | 27295.5                   | 26664.8                   | 24781.6                   |

Notes: 95% confidence intervals in brackets.

\* p &lt; .05, \*\* p &lt; .01, \*\*\* p &lt; .001.

Destination parameters (which equal -1 × origin parameters) and destination weight (which equals 1 – origin weight) not displayed.

Table A7: DRM of allostatic load, social class determined by dominance principle

|                                      | (1)                       | (2)                       | (3)                       | (4)                       | (5)                       | (6)                       |
|--------------------------------------|---------------------------|---------------------------|---------------------------|---------------------------|---------------------------|---------------------------|
| Working class                        | 0.22***<br>[0.18,0.25]    | 0.22***<br>[0.18,0.26]    | 0.22***<br>[0.18,0.25]    | 0.22***<br>[0.18,0.26]    | 0.21***<br>[0.18,0.25]    | 0.22***<br>[0.18,0.26]    |
| Intermediate class                   | 0.00<br>[-0.04,0.04]      | -0.00<br>[-0.04,0.04]     | 0.00<br>[-0.04,0.04]      | -0.00<br>[-0.04,0.04]     | 0.01<br>[-0.04,0.05]      | 0.00<br>[-0.04,0.05]      |
| Salariat                             | -0.22***<br>[-0.25,-0.19] | -0.22***<br>[-0.25,-0.18] | -0.22***<br>[-0.25,-0.18] | -0.22***<br>[-0.25,-0.18] | -0.22***<br>[-0.26,-0.19] | -0.22***<br>[-0.25,-0.18] |
| Origin weight                        | 0.49<br>[0.41,0.57]       | 0.47<br>[0.39,0.56]       | 0.54<br>[0.42,0.66]       | 0.40<br>[0.25,0.55]       | 0.56<br>[0.43,0.68]       | 0.38<br>[0.20,0.55]       |
| Sex (1 = female)                     | -0.21***<br>[-0.25,-0.17] | -0.21***<br>[-0.25,-0.17] | -0.21***<br>[-0.25,-0.17] | -0.21***<br>[-0.25,-0.17] | -0.21***<br>[-0.25,-0.17] | -0.21***<br>[-0.25,-0.17] |
| Age (centered)                       | 0.02***<br>[0.02,0.02]    | 0.02***<br>[0.02,0.02]    | 0.02***<br>[0.02,0.02]    | 0.02***<br>[0.02,0.02]    | 0.02***<br>[0.02,0.02]    | 0.02***<br>[0.02,0.02]    |
| Ethnicity (1 = white)                | -0.14**<br>[-0.24,-0.04]  | -0.14**<br>[-0.24,-0.04]  | -0.14**<br>[-0.24,-0.04]  | -0.14**<br>[-0.24,-0.04]  | -0.14**<br>[-0.24,-0.04]  | -0.14**<br>[-0.24,-0.04]  |
| Marital status (ref. married)        |                           |                           |                           |                           |                           |                           |
| Single/never married (1 = yes)       | -0.10***<br>[-0.15,-0.04] | -0.10***<br>[-0.15,-0.04] | -0.10***<br>[-0.15,-0.04] | -0.10***<br>[-0.15,-0.04] | -0.10***<br>[-0.15,-0.04] | -0.10***<br>[-0.15,-0.04] |
| Divorced/widowed (1 = yes)           | 0.07**<br>[0.02,0.12]     | 0.07*<br>[0.02,0.12]      | 0.07**<br>[0.02,0.12]     | 0.07**<br>[0.02,0.12]     | 0.07**<br>[0.02,0.12]     | 0.07**<br>[0.02,0.12]     |
| Labor market status (ref. working)   |                           |                           |                           |                           |                           |                           |
| Retired (1 = yes)                    | -0.11***<br>[-0.17,-0.05] | -0.11***<br>[-0.17,-0.05] | -0.11***<br>[-0.17,-0.05] | -0.11***<br>[-0.17,-0.05] | -0.11***<br>[-0.17,-0.05] | -0.11***<br>[-0.17,-0.05] |
| Other labour market status (1 = yes) | 0.20***<br>[0.13,0.28]    | 0.20***<br>[0.13,0.28]    | 0.20***<br>[0.13,0.28]    | 0.20***<br>[0.13,0.28]    | 0.20***<br>[0.13,0.28]    | 0.20***<br>[0.13,0.28]    |
| Mobility in any direction (1 = yes)  |                           | 0.03<br>[-0.01,0.07]      |                           |                           |                           |                           |
| Downward mobility (1 = yes)          |                           |                           | 0.04<br>[-0.03,0.11]      |                           |                           |                           |
| Upward mobility (1 = yes)            |                           |                           |                           | 0.05<br>[-0.02,0.12]      |                           |                           |
| One-step downward mobility (1 = yes) |                           |                           |                           |                           | 0.03<br>[-0.04,0.11]      |                           |
| Two-step downward mobility (1 = yes) |                           |                           |                           |                           | 0.08<br>[-0.03,0.19]      |                           |
| One-step upward mobility (1 = yes)   |                           |                           |                           |                           |                           | 0.05<br>[-0.02,0.12]      |
| Two-step upward mobility (1 = yes)   |                           |                           |                           |                           |                           | 0.08<br>[-0.03,0.18]      |
| Constant                             | 0.27***<br>[0.17,0.37]    | 0.25***<br>[0.15,0.36]    | 0.26***<br>[0.15,0.36]    | 0.26***<br>[0.15,0.36]    | 0.26***<br>[0.15,0.36]    | 0.25***<br>[0.15,0.36]    |
| Observations                         | 9,851                     | 9,851                     | 9,851                     | 9,851                     | 9,851                     | 9,851                     |
| AIC                                  | 26862.4                   | 26862.3                   | 26863.1                   | 26862.5                   | 26864.3                   | 26864.1                   |
| BIC                                  | 26948.7                   | 26955.9                   | 26956.6                   | 26956.0                   | 26965.0                   | 26964.8                   |

Notes: 95% confidence intervals in brackets.\* p <.05, \*\* p <.01, \*\*\* p <.001.

Destination parameters (which equal -1 × origin parameters) and destination weight (which equals 1 – origin weight) not displayed.

Table A8: DRM of allostatic load, five classes

|                                       | (1)                       | (2)                       | (3)                       | (4)                       | (5)                       | (6)                       |
|---------------------------------------|---------------------------|---------------------------|---------------------------|---------------------------|---------------------------|---------------------------|
| Routine                               | 0.23***<br>[0.17,0.29]    | 0.23***<br>[0.17,0.29]    | 0.23***<br>[0.17,0.30]    | 0.23***<br>[0.17,0.29]    | 0.23***<br>[0.16,0.29]    | 0.24***<br>[0.17,0.30]    |
| Semi-routine                          | 0.21***<br>[0.15,0.27]    | 0.21***<br>[0.15,0.27]    | 0.21***<br>[0.15,0.27]    | 0.21***<br>[0.15,0.28]    | 0.22***<br>[0.16,0.29]    | 0.21***<br>[0.15,0.27]    |
| Intermediate                          | -0.01<br>[-0.05,0.04]     | -0.01<br>[-0.05,0.04]     | -0.01<br>[-0.06,0.04]     | -0.01<br>[-0.05,0.04]     | -0.02<br>[-0.07,0.03]     | -0.01<br>[-0.06,0.04]     |
| Lower salariat                        | -0.15***<br>[-0.21,-0.09] | -0.15***<br>[-0.21,-0.09] | -0.15***<br>[-0.21,-0.09] | -0.15***<br>[-0.21,-0.09] | -0.14***<br>[-0.20,-0.09] | -0.16***<br>[-0.22,-0.09] |
| Higher salariat                       | -0.29***<br>[-0.34,-0.23] | -0.29***<br>[-0.34,-0.24] | -0.29***<br>[-0.34,-0.23] | -0.29***<br>[-0.35,-0.24] | -0.29***<br>[-0.34,-0.23] | -0.28***<br>[-0.34,-0.22] |
| Origin weight                         | 0.44<br>[0.34,0.53]       | 0.44<br>[0.35,0.53]       | 0.43<br>[0.26,0.59]       | 0.46<br>[0.30,0.62]       | 0.40<br>[0.22,0.58]       | 0.51<br>[0.33,0.68]       |
| Sex (1 = female)                      | -0.23***<br>[-0.27,-0.19] | -0.23***<br>[-0.27,-0.19] | -0.23***<br>[-0.27,-0.19] | -0.23***<br>[-0.27,-0.19] | -0.23***<br>[-0.27,-0.19] | -0.23***<br>[-0.27,-0.19] |
| Age (centered)                        | 0.02***<br>[0.02,0.02]    | 0.02***<br>[0.02,0.02]    | 0.02***<br>[0.02,0.02]    | 0.02***<br>[0.02,0.02]    | 0.02***<br>[0.02,0.02]    | 0.02***<br>[0.02,0.02]    |
| Ethnicity (1 = white)                 | -0.14**<br>[-0.25,-0.04]  | -0.14**<br>[-0.25,-0.04]  | -0.15**<br>[-0.25,-0.04]  | -0.14**<br>[-0.25,-0.04]  | -0.14**<br>[-0.25,-0.04]  | -0.15**<br>[-0.25,-0.04]  |
| Marital status (ref. married)         |                           |                           |                           |                           |                           |                           |
| Single/never married (1 = yes)        | -0.09**<br>[-0.14,-0.03]  | -0.09**<br>[-0.14,-0.03]  | -0.09**<br>[-0.14,-0.03]  | -0.09**<br>[-0.14,-0.03]  | -0.09**<br>[-0.14,-0.03]  | -0.09**<br>[-0.14,-0.03]  |
| Divorced/widowed (1 = yes)            | 0.08**<br>[0.03,0.14]     | 0.08**<br>[0.03,0.13]     | 0.08**<br>[0.03,0.14]     | 0.08**<br>[0.03,0.13]     | 0.08**<br>[0.03,0.13]     | 0.08**<br>[0.03,0.13]     |
| Labor market status (ref. working)    |                           |                           |                           |                           |                           |                           |
| Retired (1 = yes)                     | -0.09**<br>[-0.15,-0.02]  | -0.09**<br>[-0.15,-0.02]  | -0.09**<br>[-0.15,-0.02]  | -0.09**<br>[-0.15,-0.02]  | -0.09**<br>[-0.15,-0.02]  | -0.09**<br>[-0.15,-0.02]  |
| Other labour market status (1 = yes)  | 0.21***<br>[0.13,0.28]    | 0.21***<br>[0.13,0.28]    | 0.21***<br>[0.13,0.28]    | 0.21***<br>[0.13,0.28]    | 0.21***<br>[0.13,0.28]    | 0.21***<br>[0.13,0.28]    |
| Mobility in any direction (1 = yes)   |                           | -0.01<br>[-0.05,0.04]     |                           |                           |                           |                           |
| Downward mobility (1 = yes)           |                           |                           | -0.01<br>[-0.08,0.07]     |                           |                           |                           |
| Upward mobility (1 = yes)             |                           |                           |                           | -0.01<br>[-0.08,0.06]     |                           |                           |
| One-step downward mobility (1 = yes)  |                           |                           |                           |                           | -0.03<br>[-0.10,0.05]     |                           |
| Two-step downward mobility (1 = yes)  |                           |                           |                           |                           | 0.02<br>[-0.08,0.12]      |                           |
| Three-step upward mobility (1 = yes)  |                           |                           |                           |                           | -0.10<br>[-0.26,0.07]     |                           |
| Four-step downward mobility (1 = yes) |                           |                           |                           |                           | -0.04<br>[-0.31,0.23]     |                           |
| One-step upward mobility (1 = yes)    |                           |                           |                           |                           |                           | -0.01<br>[-0.08,0.06]     |
| Two-step upward mobility (1 = yes)    |                           |                           |                           |                           |                           | -0.04<br>[-0.12,0.05]     |
| Three-step upward mobility (1 = yes)  |                           |                           |                           |                           |                           | -0.04<br>[-0.16,0.08]     |
| Four-step upward mobility (1 = yes)   |                           |                           |                           |                           |                           | -0.13<br>[-0.31,0.06]     |
| Constant                              | 0.27***<br>[0.16,0.37]    | 0.27**<br>[0.16,0.39]     | 0.27***<br>[0.16,0.38]    | 0.27***<br>[0.16,0.38]    | 0.28***<br>[0.16,0.39]    | 0.28***<br>[0.17,0.39]    |
| Observations                          | 9,566                     | 9,566                     | 9,566                     | 9,566                     | 9,566                     | 9,566                     |
| AIC                                   | 26128.2                   | 26130.1                   | 26130.2                   | 26130.1                   | 26133.5                   | 26134.4                   |
| BIC                                   | 26228.5                   | 26237.6                   | 26237.7                   | 26237.6                   | 26262.5                   | 26263.4                   |

Notes: 95% confidence intervals in brackets.

\* p <.05, \*\* p <.01, \*\*\* p <.001.

Destination parameters (which equal -1 × origin parameters) and destination weight (which equals 1 – origin weight) not displayed.

Table A9: DRM of allostatic load, controlling for education

|                                      | (1)                       | (2)                       | (3)                       | (4)                       | (5)                       | (6)                       |
|--------------------------------------|---------------------------|---------------------------|---------------------------|---------------------------|---------------------------|---------------------------|
| Working class                        | 0.17***<br>[0.14,0.21]    | 0.17***<br>[0.14,0.21]    | 0.17***<br>[0.14,0.21]    | 0.18***<br>[0.14,0.22]    | 0.17***<br>[0.13,0.21]    | 0.18***<br>[0.14,0.22]    |
| Intermediate class                   | -0.03<br>[-0.07,0.02]     | -0.03<br>[-0.07,0.02]     | -0.03<br>[-0.07,0.02]     | -0.03<br>[-0.08,0.02]     | -0.03<br>[-0.07,0.02]     | -0.04<br>[-0.09,0.01]     |
| Salariat                             | -0.15***<br>[-0.19,-0.11] | -0.15***<br>[-0.19,-0.11] | -0.15***<br>[-0.19,-0.11] | -0.14***<br>[-0.18,-0.10] | -0.15***<br>[-0.19,-0.11] | -0.14***<br>[-0.18,-0.10] |
| Origin weight                        | 0.56<br>[0.44,0.68]       | 0.56<br>[0.43,0.68]       | 0.54<br>[0.38,0.71]       | 0.49<br>[0.26,0.72]       | 0.55<br>[0.36,0.73]       | 0.51<br>[0.27,0.74]       |
| Sex (1 = female)                     | -0.21***<br>[-0.25,-0.18] | -0.21***<br>[-0.25,-0.18] | -0.21***<br>[-0.25,-0.18] | -0.21***<br>[-0.25,-0.18] | -0.21***<br>[-0.25,-0.18] | -0.21***<br>[-0.25,-0.18] |
| Age (centered)                       | 0.02***<br>[0.01,0.02]    | 0.02***<br>[0.01,0.02]    | 0.02***<br>[0.01,0.02]    | 0.02***<br>[0.01,0.02]    | 0.02***<br>[0.01,0.02]    | 0.02***<br>[0.01,0.02]    |
| Ethnicity (1 = white)                | -0.16**<br>[-0.26,-0.06]  | -0.16**<br>[-0.26,-0.06]  | -0.16**<br>[-0.26,-0.06]  | -0.16**<br>[-0.26,-0.06]  | -0.16**<br>[-0.26,-0.06]  | -0.16**<br>[-0.26,-0.06]  |
| Marital status (ref. married)        |                           |                           |                           |                           |                           |                           |
| Single/never married (1 = yes)       | -0.09**<br>[-0.14,-0.03]  | -0.09**<br>[-0.14,-0.03]  | -0.09**<br>[-0.14,-0.03]  | -0.09**<br>[-0.14,-0.03]  | -0.09**<br>[-0.14,-0.03]  | -0.09**<br>[-0.14,-0.03]  |
| Divorced/widowed (1 = yes)           | 0.08**<br>[0.03,0.13]     | 0.08**<br>[0.03,0.13]     | 0.08**<br>[0.03,0.13]     | 0.08**<br>[0.03,0.13]     | 0.08**<br>[0.03,0.13]     | 0.08**<br>[0.03,0.13]     |
| Labor market status (ref. working)   |                           |                           |                           |                           |                           |                           |
| Retired (1 = yes)                    | -0.12***<br>[-0.18,-0.06] | -0.12***<br>[-0.18,-0.06] | -0.12***<br>[-0.18,-0.06] | -0.12***<br>[-0.18,-0.06] | -0.12***<br>[-0.18,-0.06] | -0.12***<br>[-0.18,-0.06] |
| Other labour market status (1 = yes) | 0.19***<br>[0.12,0.27]    | 0.19***<br>[0.12,0.27]    | 0.19***<br>[0.12,0.27]    | 0.19***<br>[0.12,0.26]    | 0.19***<br>[0.12,0.27]    | 0.19***<br>[0.12,0.26]    |
| University (1 = yes)                 | -0.12***<br>[-0.16,-0.07] | -0.12***<br>[-0.16,-0.07] | -0.12***<br>[-0.16,-0.07] | -0.12***<br>[-0.16,-0.07] | -0.12***<br>[-0.16,-0.07] | -0.12***<br>[-0.16,-0.07] |
| No qualifications (1 = yes)          | 0.12***<br>[0.06,0.19]    | 0.12***<br>[0.06,0.19]    | 0.12***<br>[0.06,0.19]    | 0.13***<br>[0.06,0.19]    | 0.12***<br>[0.06,0.19]    | 0.12***<br>[0.06,0.19]    |
| Mobility in any direction (1 = yes)  |                           | 0.00<br>[-0.04,0.05]      |                           |                           |                           |                           |
| Downward mobility (1 = yes)          |                           |                           | -0.01<br>[-0.08,0.06]     |                           |                           |                           |
| Upward mobility (1 = yes)            |                           |                           |                           | 0.03<br>[-0.05,0.11]      |                           |                           |
| One-step downward mobility (1 = yes) |                           |                           |                           |                           | -0.01<br>[-0.08,0.06]     |                           |
| Two-step downward mobility (1 = yes) |                           |                           |                           |                           | -0.01<br>[-0.12,0.11]     |                           |
| One-step upward mobility (1 = yes)   |                           |                           |                           |                           |                           | 0.03<br>[-0.05,0.11]      |
| Two-step upward mobility (1 = yes)   |                           |                           |                           |                           |                           | 0.02<br>[-0.08,0.11]      |
| Constant                             | 0.29***<br>[0.18,0.39]    | 0.29***<br>[0.18,0.39]    | 0.29***<br>[0.18,0.40]    | 0.28***<br>[0.17,0.39]    | 0.29***<br>[0.18,0.40]    | 0.28***<br>[0.17,0.39]    |
| Observations                         | 9,814                     | 9,814                     | 9,814                     | 9,814                     | 9,814                     | 9,814                     |
| AIC                                  | 26726.3                   | 26728.3                   | 26728.3                   | 26727.8                   | 26730.3                   | 26729.6                   |
| BIC                                  | 26827.0                   | 26836.1                   | 26836.1                   | 26835.7                   | 26845.3                   | 26844.7                   |

Notes: 95% confidence intervals in brackets.

\* p <.05, \*\* p <.01, \*\*\* p <.001.

Destination parameters (which equal -1 × origin parameters) and destination weight (which equals 1 – origin weight) not displayed.

Table A10: DRM of allostatic load, stratified by sex

|                                      | (1)<br>Men                | (2)<br>Women              | (3)<br>Men                | (4)<br>Women              | (5)<br>Men                | (6)<br>Women              | (7)<br>Men                | (8)<br>Women              | (9)<br>Men                | (10)<br>Women             | (11)<br>Men               | (12)<br>Women             |
|--------------------------------------|---------------------------|---------------------------|---------------------------|---------------------------|---------------------------|---------------------------|---------------------------|---------------------------|---------------------------|---------------------------|---------------------------|---------------------------|
| Working class                        | 0.15***<br>[0.10,0.21]    | 0.27***<br>[0.23,0.32]    | 0.16***<br>[0.11,0.21]    | 0.27***<br>[0.22,0.32]    | 0.16***<br>[0.11,0.21]    | 0.27***<br>[0.23,0.32]    | 0.16***<br>[0.10,0.21]    | 0.26***<br>[0.19,0.33]    | 0.16***<br>[0.11,0.21]    | 0.28***<br>[0.23,0.32]    | 0.16***<br>[0.09,0.23]    | 0.26***<br>[0.19,0.33]    |
| Intermediate class                   | -0.00<br>[-0.06,0.06]     | -0.05<br>[-0.11,0.01]     | -0.01<br>[-0.07,0.05]     | -0.04<br>[-0.10,0.03]     | -0.01<br>[-0.08,0.06]     | -0.05<br>[-0.11,0.01]     | 0.00<br>[-0.06,0.06]      | -0.03<br>[-0.14,0.08]     | -0.00<br>[-0.07,0.06]     | -0.06<br>[-0.13,0.00]     | -0.01<br>[-0.10,0.08]     | -0.02<br>[-0.13,0.08]     |
| Salariat                             | -0.15***<br>[-0.20,-0.10] | -0.22***<br>[-0.27,-0.17] | -0.15***<br>[-0.20,-0.10] | -0.23***<br>[-0.28,-0.18] | -0.15***<br>[-0.20,-0.09] | -0.22***<br>[-0.27,-0.17] | -0.16***<br>[-0.20,-0.11] | -0.24***<br>[-0.30,-0.17] | -0.15***<br>[-0.21,-0.10] | -0.21***<br>[-0.27,-0.16] | -0.15***<br>[-0.21,-0.10] | -0.24***<br>[-0.30,-0.17] |
| Origin weight                        | 0.47<br>[0.30,0.64]       | 0.51<br>[0.40,0.61]       | 0.44<br>[0.27,0.62]       | 0.52<br>[0.41,0.64]       | 0.55<br>[0.28,0.82]       | 0.44<br>[0.29,0.59]       | 0.24<br>[-0.09,0.56]      | 0.61<br>[0.25,0.96]       | 0.57<br>[0.30,0.83]       | 0.42<br>[0.26,0.58]       | 0.30<br>[-0.21,0.81]      | 0.59<br>[0.25,0.93]       |
| Age (centered)                       | 0.01***<br>[0.01,0.02]    | 0.02***<br>[0.02,0.02]    |
| Ethnicity (1 = white)                | -0.22**<br>[-0.38,-0.06]  | -0.09<br>[-0.21,0.03]     | -0.22**<br>[-0.38,-0.05]  | -0.09<br>[-0.21,0.03]     | -0.22**<br>[-0.38,-0.06]  | -0.09<br>[-0.22,0.03]     | -0.22**<br>[-0.38,-0.05]  | -0.09<br>[-0.21,0.03]     | -0.22**<br>[-0.38,-0.06]  | -0.09<br>[-0.21,0.03]     | -0.22**<br>[-0.38,-0.06]  | -0.09<br>[-0.21,0.03]     |
| Marital status (ref. married)        |                           |                           |                           |                           |                           |                           |                           |                           |                           |                           |                           |                           |
| Single/never married (1 = yes)       | -0.14***<br>[-0.22,-0.06] | -0.05<br>[-0.12,0.03]     | -0.14***<br>[-0.22,-0.06] | -0.05<br>[-0.12,0.03]     | -0.14***<br>[-0.22,-0.06] | -0.05<br>[-0.12,0.03]     | -0.15***<br>[-0.23,-0.07] | -0.05<br>[-0.12,0.03]     | -0.14***<br>[-0.22,-0.06] | -0.05<br>[-0.12,0.03]     | -0.14***<br>[-0.22,-0.06] | -0.05<br>[-0.12,0.03]     |
| Divorced/widowed (1 = yes)           | 0.07<br>[-0.01,0.14]      | 0.07*<br>[0.01,0.13]      | 0.07<br>[-0.01,0.14]      | 0.07*<br>[0.01,0.13]      | 0.07<br>[-0.01,0.14]      | 0.07*<br>[0.01,0.13]      | 0.07<br>[-0.01,0.15]      | 0.07*<br>[0.01,0.13]      | 0.07<br>[-0.01,0.14]      | 0.07*<br>[0.01,0.13]      | 0.07<br>[-0.01,0.14]      | 0.07*<br>[0.01,0.14]      |
| Labor market status (ref. working)   |                           |                           |                           |                           |                           |                           |                           |                           |                           |                           |                           |                           |
| Retired (1 = yes)                    | -0.23***<br>[-0.32,-0.14] | -0.01<br>[-0.10,0.08]     | -0.23***<br>[-0.32,-0.14] | -0.01<br>[-0.10,0.08]     | -0.23***<br>[-0.32,-0.14] | -0.01<br>[-0.10,0.08]     | -0.23***<br>[-0.32,-0.14] | -0.01<br>[-0.10,0.08]     | -0.23***<br>[-0.32,-0.14] | -0.01<br>[-0.10,0.07]     | -0.23***<br>[-0.32,-0.14] | -0.01<br>[-0.10,0.08]     |
| Other labour market status (1 = yes) | 0.34***<br>[0.20,0.49]    | 0.20***<br>[0.11,0.28]    | 0.35***<br>[0.20,0.49]    | 0.20***<br>[0.12,0.28]    | 0.34***<br>[0.20,0.49]    | 0.20***<br>[0.11,0.28]    | 0.35***<br>[0.20,0.49]    | 0.20***<br>[0.12,0.28]    | 0.34***<br>[0.20,0.49]    | 0.20***<br>[0.11,0.28]    | 0.35***<br>[0.20,0.49]    | 0.20***<br>[0.12,0.28]    |
| Mobility in any direction (1 = yes)  |                           |                           | 0.04<br>[-0.01,0.10]      | -0.03<br>[-0.09,0.02]     |                           |                           |                           |                           |                           |                           |                           |                           |
| Downward mobility (1 = yes)          |                           |                           |                           |                           | 0.05<br>[-0.07,0.16]      | -0.06<br>[-0.15,0.04]     |                           |                           |                           |                           |                           |                           |
| Upward mobility (1 = yes)            |                           |                           |                           |                           |                           |                           | 0.10<br>[-0.01,0.21]      | -0.06<br>[-0.23,0.12]     |                           |                           |                           |                           |
| One-step downward mobility (1 = yes) |                           |                           |                           |                           |                           |                           |                           |                           | 0.04<br>[-0.08,0.15]      | -0.05<br>[-0.14,0.04]     |                           |                           |
| Two-step downward mobility (1 = yes) |                           |                           |                           |                           |                           |                           |                           |                           | 0.08<br>[-0.08,0.24]      | -0.11<br>[-0.27,0.05]     |                           |                           |
| One-step upward mobility (1 = yes)   |                           |                           |                           |                           |                           |                           |                           |                           |                           |                           | 0.10<br>[-0.02,0.21]      | -0.06<br>[-0.23,0.11]     |
| Two-step upward mobility (1 = yes)   |                           |                           |                           |                           |                           |                           |                           |                           |                           |                           | 0.06<br>[-0.16,0.28]      | -0.03<br>[-0.22,0.16]     |
| Constant                             | 0.35***<br>[0.19,0.52]    | -0.06<br>[-0.18,0.07]     | 0.33***<br>[0.16,0.50]    | -0.04<br>[-0.17,0.09]     | 0.34***<br>[0.17,0.51]    | -0.04<br>[-0.17,0.09]     | 0.33***<br>[0.16,0.49]    | -0.04<br>[-0.17,0.09]     | 0.34***<br>[0.17,0.51]    | -0.04<br>[-0.17,0.09]     | 0.33***<br>[0.16,0.50]    | -0.04<br>[-0.17,0.09]     |
| Observations                         | 4,376                     | 5,475                     | 4,376                     | 5,475                     | 4,376                     | 5,475                     | 4,376                     | 5,475                     | 4,376                     | 5,475                     | 4,376                     | 5,475                     |
| AIC                                  | 11691.0                   | 15066.5                   | 11690.7                   | 15067.2                   | 11692.3                   | 15067.0                   | 11689.5                   | 15067.6                   | 11694.0                   | 15068.3                   | 11691.2                   | 15069.4                   |
| BIC                                  | 11761.2                   | 15139.2                   | 11767.3                   | 15146.5                   | 11768.9                   | 15146.3                   | 11766.1                   | 15146.9                   | 11776.9                   | 15154.2                   | 11774.2                   | 15155.3                   |

Notes: 95% confidence intervals in brackets.

\* p <.05, \*\* p <.01, \*\*\* p <.001.

Destination parameters (which equal -1 × origin parameters) and destination weight (which equals 1 – origin weight) not displayed.

Table A11: DRM of allostatic load, controlling for health behaviors in Wave 2

|                                      | (1)           | (2)           | (3)           | (4)           | (5)           | (6)           |
|--------------------------------------|---------------|---------------|---------------|---------------|---------------|---------------|
| Working class                        | 0.16***       | 0.16***       | 0.16***       | 0.16***       | 0.16***       | 0.17***       |
|                                      | [0.13,0.20]   | [0.13,0.20]   | [0.13,0.20]   | [0.13,0.20]   | [0.13,0.20]   | [0.13,0.20]   |
| Intermediate class                   | -0.01         | -0.01         | -0.01         | -0.01         | -0.01         | -0.02         |
|                                      | [-0.05,0.03]  | [-0.05,0.03]  | [-0.05,0.03]  | [-0.06,0.03]  | [-0.05,0.03]  | [-0.06,0.03]  |
| Salariat                             | -0.15***      | -0.15***      | -0.15***      | -0.15***      | -0.15***      | -0.15***      |
|                                      | [-0.19,-0.12] | [-0.19,-0.12] | [-0.19,-0.12] | [-0.19,-0.12] | [-0.19,-0.12] | [-0.19,-0.11] |
| Origin weight                        | 0.58          | 0.58          | 0.57          | 0.56          | 0.57          | 0.58          |
|                                      | [0.47,0.69]   | [0.47,0.70]   | [0.41,0.73]   | [0.34,0.78]   | [0.40,0.74]   | [0.34,0.81]   |
| Sex (1 = female)                     | -0.23***      | -0.23***      | -0.23***      | -0.23***      | -0.23***      | -0.23***      |
|                                      | [-0.27,-0.19] | [-0.27,-0.19] | [-0.27,-0.19] | [-0.27,-0.19] | [-0.27,-0.19] | [-0.27,-0.19] |
| Age (centered)                       | 0.02***       | 0.02***       | 0.02***       | 0.02***       | 0.02***       | 0.02***       |
|                                      | [0.01,0.02]   | [0.01,0.02]   | [0.01,0.02]   | [0.01,0.02]   | [0.01,0.02]   | [0.01,0.02]   |
| Ethnicity (1 = white)                | -0.14**       | -0.14**       | -0.14**       | -0.14**       | -0.14**       | -0.14**       |
|                                      | [-0.24,-0.04] | [-0.24,-0.04] | [-0.24,-0.04] | [-0.24,-0.04] | [-0.24,-0.04] | [-0.24,-0.04] |
| Marital status (ref. married)        |               |               |               |               |               |               |
| Single/never married (1 = yes)       | -0.11***      | -0.11***      | -0.11***      | -0.11***      | -0.11***      | -0.11***      |
|                                      | [-0.17,-0.06] | [-0.17,-0.06] | [-0.17,-0.06] | [-0.17,-0.06] | [-0.17,-0.06] | [-0.17,-0.06] |
| Divorced/widowed (1 = yes)           | 0.05*         | 0.05*         | 0.05*         | 0.05*         | 0.05*         | 0.05*         |
|                                      | [0.00,0.10]   | [0.00,0.10]   | [0.00,0.10]   | [0.00,0.10]   | [0.00,0.10]   | [0.00,0.10]   |
| Labor market status (ref. working)   |               |               |               |               |               |               |
| Retired (1 = yes)                    | -0.10**       | -0.10**       | -0.10**       | -0.10**       | -0.10**       | -0.10**       |
|                                      | [-0.16,-0.04] | [-0.16,-0.04] | [-0.16,-0.04] | [-0.16,-0.04] | [-0.16,-0.04] | [-0.16,-0.04] |
| Other labour market status (1 = yes) | 0.12**        | 0.12**        | 0.12**        | 0.12**        | 0.12**        | 0.12**        |
|                                      | [0.04,0.19]   | [0.04,0.19]   | [0.04,0.19]   | [0.04,0.19]   | [0.04,0.19]   | [0.04,0.19]   |
| Sport activity ranking               | -0.07***      | -0.07***      | -0.07***      | -0.07***      | -0.07***      | -0.07***      |
|                                      | [-0.07,-0.06] | [-0.07,-0.06] | [-0.07,-0.06] | [-0.07,-0.06] | [-0.07,-0.06] | [-0.07,-0.06] |
| Ex-smoker                            | 0.03          | 0.03          | 0.03          | 0.03          | 0.03          | 0.03          |
|                                      | [-0.01,0.07]  | [-0.01,0.07]  | [-0.01,0.07]  | [-0.01,0.07]  | [-0.01,0.07]  | [-0.01,0.07]  |
| Current smoker                       | 0.19***       | 0.19***       | 0.19***       | 0.19***       | 0.19***       | 0.19***       |
|                                      | [0.13,0.25]   | [0.13,0.25]   | [0.13,0.25]   | [0.14,0.25]   | [0.13,0.25]   | [0.13,0.25]   |
| Fruit/Veg. 1-3 d./w.                 | 0.04          | 0.04          | 0.04          | 0.04          | 0.04          | 0.04          |
|                                      | [-0.05,0.13]  | [-0.05,0.13]  | [-0.05,0.13]  | [-0.05,0.13]  | [-0.05,0.13]  | [-0.05,0.13]  |
| Fruit/Veg. 4-6 d./w.                 | 0.05          | 0.05          | 0.05          | 0.05          | 0.05          | 0.05          |
|                                      | [-0.05,0.15]  | [-0.05,0.15]  | [-0.05,0.15]  | [-0.05,0.15]  | [-0.05,0.15]  | [-0.05,0.15]  |
| Fruit/Veg. every day                 | -0.03         | -0.03         | -0.03         | -0.03         | -0.03         | -0.03         |
|                                      | [-0.12,0.07]  | [-0.12,0.07]  | [-0.12,0.07]  | [-0.12,0.07]  | [-0.12,0.07]  | [-0.12,0.07]  |
| Mobility in any direction (1 = yes)  |               | -0.00         |               |               |               |               |
|                                      |               | [-0.04,0.04]  |               |               |               |               |
| Downward mobility (1 = yes)          |               |               | -0.01         |               |               |               |
|                                      |               |               | [-0.07,0.06]  |               |               |               |
| Upward mobility (1 = yes)            |               |               |               | 0.01          |               |               |
|                                      |               |               |               | [-0.07,0.09]  |               |               |
| One-step downward mobility (1 = yes) |               |               |               |               | -0.01         |               |
|                                      |               |               |               |               | [-0.08,0.06]  |               |
| Two-step downward mobility (1 = yes) |               |               |               |               | -0.01         |               |
|                                      |               |               |               |               | [-0.12,0.10]  |               |
| One-step upward mobility (1 = yes)   |               |               |               |               |               | 0.01          |
|                                      |               |               |               |               |               | [-0.07,0.09]  |
| Two-step upward mobility (1 = yes)   |               |               |               |               |               | -0.01         |
|                                      |               |               |               |               |               | [-0.10,0.09]  |
| Constant                             | 0.21**        | 0.21**        | 0.21**        | 0.21**        | 0.21**        | 0.21**        |
|                                      | [0.07,0.35]   | [0.07,0.35]   | [0.07,0.35]   | [0.07,0.35]   | [0.07,0.35]   | [0.07,0.35]   |
| Observations                         | 9,727         | 9,727         | 9,727         | 9,727         | 9,727         | 9,727         |
| AIC                                  | 26070.3       | 26072.3       | 26072.3       | 26072.3       | 26074.3       | 26074.1       |
| BIC                                  | 26199.6       | 26208.8       | 26208.8       | 26208.7       | 26217.9       | 26217.7       |

Notes: 95% confidence intervals in brackets. \* p <.05, \*\* p <.01, \*\*\* p <.001.

Destination parameters (which equal -1 × origin parameters) and destination weight (which equals 1 – origin weight) not displayed.

Table A12: DRM predicting allostatic load, excluding unemployed respondents

|                                      | (1)                       | (2)                       | (3)                       | (4)                       | (5)                       | (6)                       |
|--------------------------------------|---------------------------|---------------------------|---------------------------|---------------------------|---------------------------|---------------------------|
| Working class                        | 0.23***<br>[0.19,0.26]    | 0.23***<br>[0.19,0.26]    | 0.23***<br>[0.19,0.26]    | 0.23***<br>[0.20,0.27]    | 0.23***<br>[0.19,0.26]    | 0.23***<br>[0.20,0.27]    |
| Intermediate class                   | -0.03<br>[-0.07,0.01]     | -0.03<br>[-0.07,0.01]     | -0.03<br>[-0.07,0.01]     | -0.04<br>[-0.08,0.01]     | -0.03<br>[-0.07,0.02]     | -0.04<br>[-0.09,0.01]     |
| Salariat                             | -0.20***<br>[-0.23,-0.16] | -0.20***<br>[-0.23,-0.16] | -0.20***<br>[-0.23,-0.16] | -0.20***<br>[-0.23,-0.16] | -0.20***<br>[-0.24,-0.16] | -0.19***<br>[-0.23,-0.16] |
| Origin weight                        | 0.49<br>[0.41,0.58]       | 0.49<br>[0.40,0.58]       | 0.48<br>[0.35,0.60]       | 0.45<br>[0.28,0.61]       | 0.48<br>[0.35,0.61]       | 0.47<br>[0.30,0.64]       |
| Sex (1 = female)                     | -0.21***<br>[-0.25,-0.17] | -0.21***<br>[-0.25,-0.17] | -0.21***<br>[-0.25,-0.17] | -0.21***<br>[-0.25,-0.17] | -0.21***<br>[-0.25,-0.17] | -0.21***<br>[-0.25,-0.17] |
| Age (centered)                       | 0.02***<br>[0.02,0.02]    | 0.02***<br>[0.02,0.02]    | 0.02***<br>[0.02,0.02]    | 0.02***<br>[0.02,0.02]    | 0.02***<br>[0.02,0.02]    | 0.02***<br>[0.02,0.02]    |
| Ethnicity (1 = white)                | -0.16**<br>[-0.27,-0.06]  | -0.16**<br>[-0.27,-0.06]  | -0.16**<br>[-0.27,-0.06]  | -0.16**<br>[-0.27,-0.06]  | -0.17**<br>[-0.27,-0.06]  | -0.17**<br>[-0.27,-0.06]  |
| Marital status (ref. married)        |                           |                           |                           |                           |                           |                           |
| Single/never married (1 = yes)       | -0.08**<br>[-0.14,-0.02]  | -0.08**<br>[-0.14,-0.02]  | -0.08**<br>[-0.14,-0.02]  | -0.08**<br>[-0.14,-0.02]  | -0.08**<br>[-0.14,-0.02]  | -0.08**<br>[-0.14,-0.02]  |
| Divorced/widowed (1 = yes)           | 0.08**<br>[0.03,0.13]     | 0.08**<br>[0.03,0.13]     | 0.08**<br>[0.03,0.13]     | 0.08**<br>[0.03,0.13]     | 0.08**<br>[0.03,0.13]     | 0.08**<br>[0.03,0.13]     |
| Labor market status (ref. working)   |                           |                           |                           |                           |                           |                           |
| Retired (1 = yes)                    | -0.11***<br>[-0.17,-0.04] | -0.11***<br>[-0.17,-0.04] | -0.11***<br>[-0.17,-0.04] | -0.11***<br>[-0.17,-0.04] | -0.11***<br>[-0.17,-0.04] | -0.11***<br>[-0.17,-0.04] |
| Other labour market status (1 = yes) | 0.21***<br>[0.13,0.30]    | 0.21***<br>[0.13,0.30]    | 0.21***<br>[0.13,0.30]    | 0.21***<br>[0.13,0.30]    | 0.21***<br>[0.13,0.30]    | 0.21***<br>[0.13,0.30]    |
| Mobility in any direction (1 = yes)  |                           | 0.00<br>[-0.04,0.04]      |                           |                           |                           |                           |
| Downward mobility (1 = yes)          |                           |                           | -0.01<br>[-0.08,0.05]     |                           |                           |                           |
| Upward mobility (1 = yes)            |                           |                           |                           | 0.03<br>[-0.05,0.10]      |                           |                           |
| One-step downward mobility (1 = yes) |                           |                           |                           |                           | -0.02<br>[-0.09,0.05]     |                           |
| Two-step downward mobility (1 = yes) |                           |                           |                           |                           | -0.00<br>[-0.11,0.11]     |                           |
| One-step upward mobility (1 = yes)   |                           |                           |                           |                           |                           | 0.03<br>[-0.05,0.11]      |
| Two-step upward mobility (1 = yes)   |                           |                           |                           |                           |                           | 0.00<br>[-0.09,0.10]      |
| Constant                             | 0.25***<br>[0.15,0.36]    | 0.25***<br>[0.14,0.36]    | 0.26***<br>[0.15,0.36]    | 0.25***<br>[0.14,0.35]    | 0.26***<br>[0.15,0.36]    | 0.25***<br>[0.14,0.36]    |
| Observations                         | 9,611                     | 9,661                     | 9,611                     | 9,611                     | 9,611                     | 9,611                     |
| AIC                                  | 26176.7                   | 26178.7                   | 26178.6                   | 26178.2                   | 26180.4                   | 26179.7                   |
| BIC                                  | 26262.8                   | 26271.9                   | 26271.8                   | 26271.4                   | 26280.8                   | 26280.1                   |

Notes: 95% confidence intervals in brackets.

\* p <.05, \*\* p <.01, \*\*\* p <.001.

Destination parameters (which equal -1 × origin parameters) and destination weight (which equals 1 – origin weight) not displayed.

Table A13: DRM of allostatic load, stratified by age groups: below and above average age (52.2 years)

|                                      | (1)           | (2)           | (3)           | (4)           | (5)           | (6)           | (7)           | (8)           | (9)           | (10)          | (11)          | (12)          |
|--------------------------------------|---------------|---------------|---------------|---------------|---------------|---------------|---------------|---------------|---------------|---------------|---------------|---------------|
|                                      | <52 y.        | >52 y.        |
| Working class                        | 0.23***       | 0.22***       | 0.23***       | 0.21***       | 0.23***       | 0.22***       | 0.24***       | 0.22***       | 0.23***       | 0.22***       | 0.24***       | 0.22***       |
|                                      | [0.18,0.28]   | [0.17,0.27]   | [0.18,0.28]   | [0.17,0.26]   | [0.18,0.28]   | [0.17,0.26]   | [0.19,0.29]   | [0.17,0.26]   | [0.17,0.28]   | [0.17,0.26]   | [0.19,0.29]   | [0.17,0.27]   |
| Intermediate class                   | -0.05         | 0.01          | -0.06         | 0.01          | -0.05         | 0.01          | -0.07*        | 0.01          | -0.05         | 0.01          | -0.06*        | 0.00          |
|                                      | [-0.11,0.01]  | [-0.05,0.07]  | [-0.12,0.00]  | [-0.05,0.07]  | [-0.11,0.01]  | [-0.05,0.07]  | [-0.13,-0.01] | [-0.05,0.07]  | [-0.11,0.02]  | [-0.05,0.07]  | [-0.13,-0.00] | [-0.06,0.07]  |
| Salariat                             | -0.18***      | -0.23***      | -0.17***      | -0.23***      | -0.18***      | -0.23***      | -0.17***      | -0.23***      | -0.18***      | -0.22***      | -0.17***      | -0.22***      |
|                                      | [-0.23,-0.13] | [-0.28,-0.18] | [-0.22,-0.13] | [-0.28,-0.18] | [-0.23,-0.13] | [-0.28,-0.18] | [-0.22,-0.12] | [-0.28,-0.18] | [-0.23,-0.13] | [-0.27,-0.17] | [-0.22,-0.12] | [-0.28,-0.17] |
| Origin weight                        | 0.52          | 0.48          | 0.51          | 0.49          | 0.54          | 0.44          | 0.40          | 0.53          | 0.55          | 0.43          | 0.39          | 0.57          |
|                                      | [0.39,0.65]   | [0.37,0.59]   | [0.37,0.64]   | [0.38,0.61]   | [0.35,0.73]   | [0.28,0.60]   | [0.20,0.60]   | [0.32,0.74]   | [0.34,0.77]   | [0.26,0.60]   | [0.18,0.61]   | [0.33,0.82]   |
| Sex (1 = female)                     | -0.38***      | -0.07*        | -0.38***      | -0.06*        | -0.38***      | -0.07*        | -0.38***      | -0.06*        | -0.38***      | -0.06*        | -0.38***      | -0.06*        |
|                                      | [-0.43,-0.33] | [-0.12,-0.01] | [-0.43,-0.33] | [-0.12,-0.01] | [-0.43,-0.33] | [-0.12,-0.01] | [-0.43,-0.33] | [-0.12,-0.01] | [-0.43,-0.33] | [-0.12,-0.01] | [-0.43,-0.33] | [-0.12,-0.01] |
| Age (centered)                       | 0.03***       | -0.00*        | 0.03***       | -0.00*        | 0.03***       | -0.00*        | 0.03***       | -0.00*        | 0.03***       | -0.00*        | 0.03***       | -0.00*        |
|                                      | [0.03,0.03]   | [-0.01,-0.00] | [0.03,0.03]   | [-0.01,-0.00] | [0.03,0.03]   | [-0.01,-0.00] | [0.03,0.03]   | [-0.01,-0.00] | [0.03,0.03]   | [-0.01,-0.00] | [0.03,0.03]   | [-0.01,-0.00] |
| Ethnicity (1 = white)                | -0.16**       | -0.16         | -0.16**       | -0.16         | -0.16**       | -0.16         | -0.16**       | -0.16         | -0.16**       | -0.16         | -0.16**       | -0.16         |
|                                      | [-0.28,-0.05] | [-0.36,0.03]  | [-0.28,-0.05] | [-0.36,0.03]  | [-0.28,-0.05] | [-0.36,0.03]  | [-0.28,-0.05] | [-0.36,0.04]  | [-0.28,-0.05] | [-0.36,0.03]  | [-0.28,-0.05] | [-0.36,0.03]  |
| Marital status (ref. married)        |               |               |               |               |               |               |               |               |               |               |               |               |
| Single/never married (1 = yes)       | -0.01         | -0.05         | -0.01         | -0.05         | -0.01         | -0.05         | -0.01         | -0.05         | -0.01         | -0.05         | -0.01         | -0.05         |
|                                      | [-0.08,0.05]  | [-0.16,0.05]  | [-0.08,0.05]  | [-0.16,0.05]  | [-0.08,0.05]  | [-0.16,0.05]  | [-0.08,0.05]  | [-0.16,0.05]  | [-0.08,0.05]  | [-0.16,0.05]  | [-0.08,0.05]  | [-0.16,0.05]  |
| Divorced/widowed (1 = yes)           | 0.08          | 0.09**        | 0.07          | 0.09**        | 0.07          | 0.09**        | 0.07          | 0.09**        | 0.08          | 0.09**        | 0.07          | 0.09**        |
|                                      | [-0.00,0.15]  | [0.03,0.16]   | [-0.00,0.15]  | [0.03,0.16]   | [-0.00,0.15]  | [0.03,0.16]   | [-0.00,0.15]  | [0.03,0.16]   | [-0.00,0.15]  | [0.03,0.16]   | [-0.00,0.15]  | [0.03,0.16]   |
| Labor market status (ref. working)   |               |               |               |               |               |               |               |               |               |               |               |               |
| Retired (1 = yes)                    | 0.13          | 0.10**        | 0.13          | 0.10**        | 0.13          | 0.10**        | 0.13          | 0.10**        | 0.13          | 0.10**        | 0.13          | 0.10**        |
|                                      | [-0.44,0.70]  | [0.03,0.17]   | [-0.44,0.70]  | [0.03,0.17]   | [-0.44,0.70]  | [0.03,0.17]   | [-0.45,0.70]  | [0.03,0.17]   | [-0.44,0.70]  | [0.03,0.17]   | [-0.45,0.70]  | [0.03,0.17]   |
| Other labour market status (1 = yes) | 0.24***       | 0.22***       | 0.24***       | 0.22***       | 0.24***       | 0.22***       | 0.24***       | 0.22***       | 0.24***       | 0.22***       | 0.24***       | 0.22***       |
|                                      | [0.15,0.33]   | [0.09,0.35]   | [0.15,0.33]   | [0.09,0.35]   | [0.15,0.33]   | [0.09,0.35]   | [0.15,0.33]   | [0.09,0.35]   | [0.15,0.33]   | [0.09,0.35]   | [0.15,0.33]   | [0.09,0.35]   |
| Mobility in any direction (1 = yes)  |               |               | 0.03          | -0.02         |               |               |               |               |               |               |               |               |
|                                      |               |               | [-0.03,0.08]  | [-0.08,0.04]  |               |               |               |               |               |               |               |               |
| Downward mobility (1 = yes)          |               |               |               |               | 0.02          | -0.04         |               |               |               |               |               |               |
|                                      |               |               |               |               | [-0.08,0.11]  | [-0.13,0.06]  |               |               |               |               |               |               |
| Upward mobility (1 = yes)            |               |               |               |               |               |               | 0.07          | -0.03         |               |               |               |               |
|                                      |               |               |               |               |               |               | [-0.03,0.16]  | [-0.13,0.08]  |               |               |               |               |
| One-step downward mobility (1 = yes) |               |               |               |               |               |               |               |               | 0.01          | -0.03         |               |               |
|                                      |               |               |               |               |               |               |               |               | [-0.08,0.11]  | [-0.13,0.07]  |               |               |
| Two-step downward mobility (1 = yes) |               |               |               |               |               |               |               |               | 0.04          | -0.07         |               |               |
|                                      |               |               |               |               |               |               |               |               | [-0.13,0.21]  | [-0.22,0.09]  |               |               |
| One-step upward mobility (1 = yes)   |               |               |               |               |               |               |               |               |               |               | 0.06          | -0.03         |
|                                      |               |               |               |               |               |               |               |               |               |               | [-0.03,0.16]  | [-0.13,0.08]  |
| Two-step upward mobility (1 = yes)   |               |               |               |               |               |               |               |               |               |               | 0.07          | -0.07         |
|                                      |               |               |               |               |               |               |               |               |               |               | [-0.05,0.20]  | [-0.21,0.08]  |
| Constant                             | 0.46***       | 0.36***       | 0.44***       | 0.37***       | 0.45***       | 0.37***       | 0.44***       | 0.37***       | 0.45***       | 0.37***       | 0.44***       | 0.37***       |
|                                      | [0.33,0.58]   | [0.16,0.56]   | [0.31,0.57]   | [0.17,0.58]   | [0.32,0.58]   | [0.17,0.58]   | [0.31,0.56]   | [0.16,0.57]   | [0.32,0.58]   | [0.17,0.58]   | [0.31,0.56]   | [0.17,0.57]   |
| Observations                         | 5,069         | 4,782         | 5,069         | 4,782         | 5,069         | 4,782         | 5,069         | 4,782         | 5,069         | 4,782         | 5,069         | 4,782         |
| AIC                                  | 13761.2       | 12880.2       | 13762.3       | 12881.7       | 13763.1       | 12881.7       | 13761.3       | 12881.9       | 13765.0       | 12883.5       | 13763.3       | 12883.4       |
| BIC                                  | 13839.6       | 12957.9       | 13847.2       | 12965.8       | 13848.0       | 12965.8       | 13846.2       | 12966.1       | 13856.4       | 12974.1       | 13854.7       | 12974.1       |

Notes: 95% confidence intervals in brackets.

\* p <.05, \*\* p <.01, \*\*\* p <.001.

Destination parameters (which equal -1 × origin parameters) and destination weight (which equals 1 – origin weight) not displayed.

Table A14: DRM of allostatic load, stratified by age groups: age groups  
25–39 years and 60–79 years

|                                      | (1)           | (2)           | (3)           | (4)           | (5)           | (6)           | (7)           | (8)           | (9)           | (10)          | (11)          | (12)          |
|--------------------------------------|---------------|---------------|---------------|---------------|---------------|---------------|---------------|---------------|---------------|---------------|---------------|---------------|
|                                      | 25–36 y.      | 60–79 y.      |
| Working class                        | 0.23***       | 0.20***       | 0.23***       | 0.19***       | 0.23***       | 0.18***       | 0.23***       | 0.20***       | 0.23***       | 0.18***       | 0.23***       | 0.20***       |
|                                      | [0.15,0.30]   | [0.14,0.25]   | [0.16,0.30]   | [0.13,0.25]   | [0.15,0.30]   | [0.12,0.24]   | [0.16,0.31]   | [0.14,0.25]   | [0.15,0.30]   | [0.12,0.24]   | [0.15,0.31]   | [0.14,0.26]   |
| Intermediate class                   | -0.01         | 0.05          | -0.02         | 0.05          | -0.01         | 0.06          | -0.02         | 0.05          | -0.01         | 0.06          | -0.02         | 0.03          |
|                                      | [-0.09,0.07]  | [-0.03,0.12]  | [-0.11,0.06]  | [-0.03,0.13]  | [-0.09,0.06]  | [-0.02,0.13]  | [-0.11,0.07]  | [-0.03,0.12]  | [-0.10,0.07]  | [-0.02,0.14]  | [-0.11,0.07]  | [-0.06,0.12]  |
| Salariat                             | -0.22***      | -0.24***      | -0.21***      | -0.24***      | -0.21***      | -0.24***      | -0.21***      | -0.24***      | -0.21***      | -0.25***      | -0.21***      | -0.23***      |
|                                      | [-0.28,-0.15] | [-0.31,-0.18] | [-0.28,-0.14] | [-0.31,-0.18] | [-0.28,-0.14] | [-0.30,-0.18] | [-0.28,-0.14] | [-0.31,-0.18] | [-0.28,-0.14] | [-0.31,-0.18] | [-0.28,-0.14] | [-0.31,-0.15] |
| Origin weight                        | 0.54          | 0.54          | 0.52          | 0.55          | 0.62          | 0.44          | 0.43          | 0.53          | 0.62          | 0.46          | 0.41          | 0.60          |
|                                      | [0.36,0.71]   | [0.39,0.68]   | [0.34,0.70]   | [0.40,0.70]   | [0.36,0.88]   | [0.23,0.66]   | [0.13,0.73]   | [0.28,0.79]   | [0.34,0.90]   | [0.25,0.67]   | [0.09,0.74]   | [0.26,0.94]   |
| Sex (1 = female)                     | -0.35***      | 0.01          | -0.35***      | 0.01          | -0.35***      | 0.01          | -0.35***      | 0.01          | -0.35***      | 0.01          | -0.35***      | 0.01          |
|                                      | [-0.44,-0.27] | [-0.06,0.07]  | [-0.44,-0.27] | [-0.06,0.07]  | [-0.44,-0.27] | [-0.06,0.07]  | [-0.44,-0.27] | [-0.06,0.07]  | [-0.44,-0.27] | [-0.06,0.07]  | [-0.44,-0.27] | [-0.06,0.07]  |
| Age (centered)                       | 0.03***       | -0.01*        | 0.03***       | -0.01*        | 0.04***       | -0.01*        | 0.03***       | -0.01*        | 0.04***       | -0.01*        | 0.03***       | -0.01*        |
|                                      | [0.02,0.05]   | [-0.01,-0.00] | [0.02,0.05]   | [-0.01,-0.00] | [0.02,0.05]   | [-0.01,-0.00] | [0.02,0.05]   | [-0.01,-0.00] | [0.02,0.05]   | [-0.01,-0.00] | [0.02,0.05]   | [-0.01,-0.00] |
| Ethnicity (1 = white)                | -0.11         | -0.29         | -0.11         | -0.29         | -0.11         | -0.30         | -0.11         | -0.29         | -0.11         | -0.30         | -0.11         | -0.29         |
|                                      | [-0.28,0.06]  | [-0.59,0.01]  | [-0.28,0.06]  | [-0.59,0.01]  | [-0.28,0.06]  | [-0.60,0.01]  | [-0.28,0.06]  | [-0.59,0.01]  | [-0.28,0.06]  | [-0.60,0.00]  | [-0.28,0.06]  | [-0.60,0.01]  |
| Marital status (ref. married)        |               |               |               |               |               |               |               |               |               |               |               |               |
| Single/never married (1 = yes)       | 0.01          | -0.09         | 0.01          | -0.09         | 0.01          | -0.09         | 0.01          | -0.09         | 0.01          | -0.09         | 0.01          | -0.09         |
|                                      | [-0.08,0.10]  | [-0.23,0.06]  | [-0.08,0.10]  | [-0.23,0.06]  | [-0.08,0.10]  | [-0.23,0.06]  | [-0.08,0.10]  | [-0.23,0.06]  | [-0.08,0.10]  | [-0.23,0.06]  | [-0.08,0.10]  | [-0.23,0.06]  |
| Divorced/widowed (1 = yes)           | -0.02         | 0.11**        | -0.02         | 0.11**        | -0.02         | 0.11**        | -0.02         | 0.11**        | -0.02         | 0.11**        | -0.02         | 0.11**        |
|                                      | [-0.19,0.16]  | [0.03,0.18]   | [-0.19,0.16]  | [0.03,0.18]   | [-0.19,0.16]  | [0.03,0.19]   | [-0.19,0.16]  | [0.03,0.18]   | [-0.19,0.16]  | [0.03,0.19]   | [-0.19,0.16]  | [0.03,0.18]   |
| Other labour market status (1 = yes) | 0.20**        | 0.26*         | 0.20**        | 0.26*         | 0.20**        | 0.26*         | 0.20**        | 0.26*         | 0.20**        | 0.26*         | 0.20**        | 0.26*         |
|                                      | [0.07,0.33]   | [0.04,0.48]   | [0.07,0.33]   | [0.04,0.48]   | [0.07,0.33]   | [0.05,0.48]   | [0.07,0.33]   | [0.04,0.48]   | [0.07,0.33]   | [0.05,0.48]   | [0.07,0.33]   | [0.04,0.48]   |
| Labor market status (ref. working)   |               |               |               |               |               |               |               |               |               |               |               |               |
| Retired (1 = yes)                    |               | 0.05          |               | 0.05          |               | 0.05          |               | 0.05          |               | 0.05          |               | 0.05          |
|                                      |               | [-0.04,0.13]  |               | [-0.04,0.13]  |               | [-0.04,0.13]  |               | [-0.04,0.13]  |               | [-0.03,0.13]  |               | [-0.04,0.13]  |
| Mobility in any direction (1 = yes)  |               |               | 0.04          | -0.03         |               |               |               |               |               |               |               |               |
|                                      |               |               | [-0.04,0.12]  | [-0.10,0.05]  |               |               |               |               |               |               |               |               |
| Downward mobility (1 = yes)          |               |               |               |               | 0.07          | -0.08         |               |               |               |               |               |               |
|                                      |               |               |               |               | [-0.08,0.21]  | [-0.20,0.05]  |               |               |               |               |               |               |
| Upward mobility (1 = yes)            |               |               |               |               |               |               | 0.06          | 0.00          |               |               |               |               |
|                                      |               |               |               |               |               |               | [-0.08,0.21]  | [-0.12,0.12]  |               |               |               |               |
| One-step downward mobility (1 = yes) |               |               |               |               |               |               |               |               | 0.07          | -0.09         |               |               |
|                                      |               |               |               |               |               |               |               |               | [-0.08,0.21]  | [-0.22,0.04]  |               |               |
| Two-step downward mobility (1 = yes) |               |               |               |               |               |               |               |               | 0.06          | -0.03         |               |               |
|                                      |               |               |               |               |               |               |               |               | [-0.15,0.28]  | [-0.23,0.17]  |               |               |
| One-step upward mobility (1 = yes)   |               |               |               |               |               |               |               |               |               |               | 0.06          | 0.00          |
|                                      |               |               |               |               |               |               |               |               |               |               | [-0.09,0.21]  | [-0.12,0.12]  |
| Two-step upward mobility (1 = yes)   |               |               |               |               |               |               |               |               |               |               | 0.08          | -0.05         |
|                                      |               |               |               |               |               |               |               |               |               |               | [-0.12,0.28]  | [-0.26,0.15]  |
| Constant                             | 0.48***       | 0.55***       | 0.46***       | 0.57***       | 0.47***       | 0.58***       | 0.46***       | 0.55***       | 0.47***       | 0.58***       | 0.46***       | 0.56***       |
|                                      | [0.22,0.75]   | [0.24,0.87]   | [0.19,0.73]   | [0.25,0.89]   | [0.20,0.73]   | [0.26,0.90]   | [0.20,0.73]   | [0.23,0.87]   | [0.20,0.73]   | [0.26,0.91]   | [0.20,0.73]   | [0.24,0.88]   |
| Observations                         | 2,004         | 2,955         | 2,004         | 2,955         | 2,004         | 2,955         | 2,004         | 2,955         | 2,004         | 2,955         | 2,004         | 2,955         |
| AIC                                  | 5308.0        | 7852.7        | 5309.1        | 7854.2        | 5309.2        | 7853.0        | 5309.3        | 7854.7        | 5311.2        | 7854.6        | 5311.3        | 7856.2        |
| BIC                                  | 5369.6        | 7924.6        | 5376.3        | 7932.1        | 5376.4        | 7930.9        | 5376.6        | 7932.6        | 5384.0        | 7938.5        | 5384.1        | 7940.1        |

Notes: 95% confidence intervals in brackets.

\* p < .05, \*\* p < .01, \*\*\* p < .001.

Destination parameters (which equal -1 × origin parameters) and destination weight (which equals 1 – origin weight) not displayed.

## References

- Benzeval, Michaela, Apostolos Davillas, Meena Kumari, and Peter Lynn, 2014. *Understanding Society, the UK Household Longitudinal Study. Biomarker User Guide and Glossary*. Colchester: Institute for Social and Economic Research.
- Blau, Peter M. and Otis Dudley Duncan, 1967. *The American Occupational Structure*. New York: Wiley.
- Breen, Richard and Jan O. Jonsson, 2005. 'Inequality of Opportunity in Comparative Perspective. Recent Research on Educational Attainment and Social Mobility.' *Annual Review of Sociology* 31: 223–243. doi: [10.1146/annurev.soc.31.041304.122232](https://doi.org/10.1146/annurev.soc.31.041304.122232).
- Chobanian, Aram V., George L. Bakris, Henry R. Black, William C.ushman, Lee A. Green, Joseph L. Izzo, Daniel W. Jones, Barry J. Materson, Suzanne Oparil, Jackson T. Wright, and Edward J. Roccella, 2003. 'Seventh Report of the Joint National Committee on Prevention, Detection, Evaluation, and Treatment of High Blood Pressure.' *Hypertension* 42(6): 1206–1252. doi: [10.1161/01.HYP.0000107251.49515.c2](https://doi.org/10.1161/01.HYP.0000107251.49515.c2).
- Erikson, Robert, 1984. 'Social Class of Men, Women, and Families.' *Sociology* 18(4): 500–514. doi: [10.1177/0038038584018004003](https://doi.org/10.1177/0038038584018004003).
- Kolovou, Genovefa D., Dimitri P. Mikhailidis, Jan Kovar, Dennis Lairon, Borge G. Nordestgaard, Teik Chye Ooi, Pablo Perez-Martinez, Helen Bilianou, Katherine Anagnostopoulou, and George Panotopoulos, 2011. 'Assessment and Clinical Relevance of Non-Fasting and Postprandial Triglycerides. An Expert Panel Statement.' *Current Vascular Pharmacology* 9(3): 258–270. doi: [10.2174/157016111795495549](https://doi.org/10.2174/157016111795495549).
- McFall, Stephanie, Jakob Petersen, Olena Kaminska, and Peter Lynn, 2014. *Understanding Society (UKHLS). Waves 2 and 3 Nurse Health Assess-*

ment, 2010-2012. *Guide to Nurse Health Assessment*. Colchester: ISER, version 2.0 edition.

NCEP Expert Panel, 2001. ‘Executive Summary of the Third Report of the National Cholesterol Education Program (NCEP) Expert Panel on Detection, Evaluation, and Treatment of High Blood Cholesterol in Adults (Adult Treatment Panel III).’ *JAMA* 285(19): 2486–2497. doi: [10.1001/jama.285.19.2486](https://doi.org/10.1001/jama.285.19.2486).

Pearson, Thomas A., George A. Mensah, R. Wayne Alexander, Jeffrey L. Anderson, Richard O. Cannon, Michael Criqui, Yazid Y. Fadl, Stephen P. Fortmann, Yuling Hong, Gary L. Myers, Nader Rifai, Sidney C. Smith, Kathryn Taubert, Russell P. Tracy, and Frank Vinicor, 2003. ‘Markers of Inflammation and Cardiovascular Disease. Application to Clinical and Public Health Practice. A Statement for Healthcare Professionals From the Centers for Disease Control and Prevention and the American Heart Association.’ *Circulation* 107(3): 499–511. doi: [10.1161/01.cir.0000052939.59093.45](https://doi.org/10.1161/01.cir.0000052939.59093.45).

Seeman, Melvin, Sharon Merkin, Arun Karlamangla, Brandon Koretz, and Teresa Seeman, 2014. ‘Social Status and Biological Dysregulation. The “Status Syndrome” and Allostatic Load.’ *Social Science and Medicine* 118: 143–151. doi: [10.1016/j.socscimed.2014.08.002](https://doi.org/10.1016/j.socscimed.2014.08.002).

Singer, Burton, Carol D. Ryff, and Teresa Seeman, 2004. *Operationalizing Allostatic Load*, pp. 113–149. Cambridge: Cambridge University Press. doi: [10.1017/CBO9781316257081.007](https://doi.org/10.1017/CBO9781316257081.007).

Torche, Florencia, 2015. ‘Analyses of Intergenerational Mobility. An Interdisciplinary Review.’ *Annals of the American Academy of Political and Social Science* 657(1): 37–62. doi: [10.1177/0002716214547476](https://doi.org/10.1177/0002716214547476).

University of Essex and Institute for Social and Economic Research, 2014. *Understanding Society. Waves 2–3 Nurse Health Assessment, 2010–2012*. Colchester: UK Data Service, 3rd edition. doi: [10.5255/UKDA-SN-7251-3](https://doi.org/10.5255/UKDA-SN-7251-3).

University of Essex, Institute for Social and Economic Research, and NatCen Social Research, 2016. *Understanding Society. Waves 1–6, 2009–2015*. UK Data Service, 8th edition. doi: [10.5255/UKDA-SN-6614-9](https://doi.org/10.5255/UKDA-SN-6614-9).

WHO, 2011. *Use of Glycated Haemoglobin (HbA1c) in the Diagnosis of Diabetes Mellitus*. Geneva: World Health Organization.

—, 2017. *Global Database on Body Mass Index*. Geneva: World Health Organization.
